# Supplementary material for: Novel computed tomography-based nomograms for the pretherapeutic prediction of response to neoadjuvant chemotherapy with S-1 and oxaliplatin with or without the addition of docetaxel in patients with advanced gastric cancer
Source: PubMed Central journal article supplement — Quant Imaging Med Surg. 2024 Aug 19;14(9):6711–23. doi: 10.21037/qims-24-748 (PMC11400639; doi:10.21037/qims-24-748), 2024-08-19
Supplement: qims-14-09-6711-rc.pdf [file qims-14-09-6711-rc.pdf]

## TRIPOD Checklist: Prediction Model Development and Validation

| Section                   | Item |     | Checklist description                                                                                                                                                                            | Reported on Page Number/Line Number | Reported on Section/Paragraph |
|---------------------------|------|-----|--------------------------------------------------------------------------------------------------------------------------------------------------------------------------------------------------|-------------------------------------|-------------------------------|
| <b>Title and abstract</b> |      |     |                                                                                                                                                                                                  |                                     |                               |
| Title                     | 1    | D;V | Identify the study as developing and/or validating a multivariable prediction model, the target population, and the outcome to be predicted.                                                     | 1/1-3                               | Title                         |
| Abstract                  | 2    | D;V | Provide a summary of objectives, study design, setting, participants, sample size, predictors, outcome, statistical analysis, results, and conclusions.                                          | 3/1-21                              | Abstract                      |
| <b>Introduction</b>       |      |     |                                                                                                                                                                                                  |                                     |                               |
| Background and objectives | 3a   | D;V | Explain the medical context (including whether diagnostic or prognostic) and rationale for developing or validating the multivariable prediction model, including references to existing models. | 5-6/2-21;1-3                        | Introduction/1                |
|                           | 3b   | D;V | Specify the objectives, including whether the study describes the development or validation of the model or both.                                                                                | 6/4-9                               | Introduction/2                |
| <b>Methods</b>            |      |     |                                                                                                                                                                                                  |                                     |                               |
| Source of data            | 4a   | D;V | Describe the study design or source of data (e.g., randomized trial, cohort, or registry data), separately for the development and validation data sets, if applicable.                          | 6/13-18                             | Participants/1-2              |
|                           | 4b   | D;V | Specify the key study dates, including start of accrual; end of accrual; and, if applicable, end of follow-up.                                                                                   | 6/17-18                             | Participants/2                |
| Participants              | 5a   | D;V | Specify key elements of the study setting (e.g., primary care, secondary care, general population) including number and location of centres.                                                     | 6/18-19                             | Participants/2                |

|              |    |     |                                                                                                                                                      |                 |                                                                  |
|--------------|----|-----|------------------------------------------------------------------------------------------------------------------------------------------------------|-----------------|------------------------------------------------------------------|
|              | 5b | D;V | Describe eligibility criteria for participants.                                                                                                      | 6-7/19-21;1-4   | Participants/2                                                   |
|              | 5c | D;V | Give details of treatments received, if relevant.                                                                                                    | 7-8/20-21;1-10  | Participants/3                                                   |
| Outcome      | 6a | D;V | Clearly define the outcome that is predicted by the prediction model, including how and when assessed.                                               | 14/7-18         | Results/4                                                        |
|              | 6b | D;V | Report any actions to blind assessment of the outcome to be predicted.                                                                               | 10-11/16-21;1-5 | Image-based evaluation of clinical response of GC after NACT/3-4 |
| Predictors   | 7a | D;V | Clearly define all predictors used in developing or validating the multivariable prediction model, including how and when they were measured.        | 10-11/20-21;1-5 | Image-based evaluation of clinical response of GC after NACT/4   |
|              | 7b | D;V | Report any actions to blind assessment of predictors for the outcome and other predictors.                                                           | 11/8-18         | Image predictor analysis                                         |
| Sample size  | 8  | D;V | Explain how the study size was arrived at.                                                                                                           | 9-10/9-21;1-5   | Image-based evaluation of clinical response of GC after NACT/1   |
| Missing data | 9  | D;V | Describe how missing data were handled (e.g., complete-case analysis, single imputation, multiple imputation) with details of any imputation method. | None            | Data that was not applicable had been excluded                   |

|                              |     |     |                                                                                                                               |                 |                                                                               |
|------------------------------|-----|-----|-------------------------------------------------------------------------------------------------------------------------------|-----------------|-------------------------------------------------------------------------------|
| Statistical analysis methods | 10a | D   | Describe how predictors were handled in the analyses.                                                                         | 11-12/21;1-7    | Statistical Analysis/1-2                                                      |
|                              | 10b | D   | Specify type of model, all model-building procedures (including any predictor selection), and method for internal validation. | 12/8-19         | Statistical Analysis/3                                                        |
|                              | 10c | V   | For validation, describe how the predictions were calculated.                                                                 | 13-14/17-21;1-4 | Independent factors to predict response to NACT with DOS or SOX               |
|                              | 10d | D;V | Specify all measures used to assess model performance and, if relevant, to compare multiple models.                           | 14/11-18        | Validation and comparison of nomograms for prediction response to DOS and SOX |
|                              | 10e | V   | Describe any model updating (e.g., recalibration) arising from the validation, if done.                                       | None            | There was not recalibration                                                   |
| Risk groups                  | 11  | D;V | Provide details on how risk groups were created, if done.                                                                     | None            | There was not risk groups                                                     |
| Development vs. validation   | 12  | V   | For validation, identify any differences from the development data in setting, eligibility criteria, outcome, and predictors. | 14/7-18         | Validation and comparison of nomograms for prediction response to DOS and SOX |
| <b>Results</b>               |     |     |                                                                                                                               |                 |                                                                               |

|                     |     |     |                                                                                                                                                                                                       |          |                                                                               |
|---------------------|-----|-----|-------------------------------------------------------------------------------------------------------------------------------------------------------------------------------------------------------|----------|-------------------------------------------------------------------------------|
| Participants        | 13a | D;V | Describe the flow of participants through the study, including the number of participants with and without the outcome and, if applicable, a summary of the follow-up time. A diagram may be helpful. | Figure 1 | Figure 1                                                                      |
|                     | 13b | D;V | Describe the characteristics of the participants (basic demographics, clinical features, available predictors), including the number of participants with missing data for predictors and outcome.    | Table 1  | Table 1                                                                       |
|                     | 13c | V   | For validation, show a comparison with the development data of the distribution of important variables (demographics, predictors and outcome).                                                        | 7        | Table 1                                                                       |
| Model development   | 14a | D   | Specify the number of participants and outcome events in each analysis.                                                                                                                               | 7/15-19  | Participants/2                                                                |
|                     | 14b | D   | If done, report the unadjusted association between each candidate predictor and outcome.                                                                                                              | Table 2  | Table 2                                                                       |
| Model specification | 15a | D   | Present the full prediction model to allow predictions for individuals (i.e., all regression coefficients, and model intercept or baseline survival at a given time point).                           | Figure 3 | Figure 3                                                                      |
|                     | 15b | D   | Explain how to use the prediction model.                                                                                                                                                              | 14/7-11  | Validation and comparison of nomograms for prediction response to DOS and SOX |
| Model performance   | 16  | D;V | Report performance measures (with CIs) for the prediction model.                                                                                                                                      | 14       | Validation and comparison of nomograms for prediction response to DOS and SOX |
| Model-updating      | 17  | V   | If done, report the results from any model updating (i.e., model specification, model performance).                                                                                                   | NONE     | There was not any model updating                                              |

| <b>Discussion</b>         |     |     |                                                                                                                                                    |                 |                             |
|---------------------------|-----|-----|----------------------------------------------------------------------------------------------------------------------------------------------------|-----------------|-----------------------------|
| Limitations               | 18  | D;V | Discuss any limitations of the study (such as nonrepresentative sample, few events per predictor, missing data).                                   | 16-17/15-21;1-5 | Discussion/4                |
| Interpretation            | 19a | V   | For validation, discuss the results with reference to performance in the development data, and any other validation data.                          | 15-16/11-21;1-3 | Discussion/2                |
|                           | 19b | D;V | Give an overall interpretation of the results, considering objectives, limitations, and results from similar studies, and other relevant evidence. | 16/4-14         | Discussion/3                |
| Implications              | 20  | D;V | Discuss the potential clinical use of the model and implications for future research.                                                              | 17/6-12         | Discussion/5                |
| <b>Other information</b>  |     |     |                                                                                                                                                    |                 |                             |
| Supplementary information | 21  | D;V | Provide information about the availability of supplementary resources, such as study protocol, Web calculator, and data sets.                      | None            | There was not any resources |
| Funding                   | 22  | D;V | Give the source of funding and the role of the funders for the present study.                                                                      | 18/2-4          | Funding                     |

\* Items relevant only to the development of a prediction model are denoted by D, items relating solely to a validation of a prediction model are denoted by V, and items relating to both are denoted D;V. We recommend using the TRIPOD Checklist in conjunction with the TRIPOD Explanation and Elaboration document.

Article information: <https://dx.doi.org/10.21037/qims-24-748>

\*As the checklist was provided upon initial submission, the page number/line number reported may be changed due to copyediting and may not be referable in the published version. In this case, the section/paragraph may be used as an alternative reference.

Updated on August 13, 2021
